# Supplementary material for: The impact of zinc oxide nanoparticles on phosphorus removal and the microbial community in activated sludge in an SBR
Source: Royal Society of Chemistry journal article supplement (doi:10.1039/c6ra19486a), 2016-01-01
Supplement: c6ra19486a1.pdf [file c6ra19486a1.pdf]

## **Supplementary data**

### **The impact of zinc oxide nanoparticles on phosphorus removal and the microbial community in activated sludge in an SBR**

**Shutao Wang\*, Weiqing Wang, Zhenrui Zhang, Hong You**

(State Key Laboratory of Urban Water Resource and Environment, Harbin Institute of  
Technology, Harbin 150090, China)

**\*Corresponding author: Shutao Wang**

E-Mail: wshutao@hit.edu.cn

Address: School of Municipal and Environmental Engineering, Harbin Institute of Technology, 73,  
Huanghe Rd., Nangang Dist., Harbin 150090, China

**Weiqing Wang**

E-Mail: 734067974@qq.com

Address: School of Municipal and Environmental Engineering, Harbin Institute of Technology, 73,  
Huanghe Rd., Nangang Dist., Harbin 150090, China

**Zhenrui Zhang**

E-Mail: zhang7610289@qq.com

Address: School of Municipal and Environmental Engineering, Harbin Institute of Technology, 73,  
Huanghe Rd., Nangang Dist., Harbin 150090, China

**Hong You**

E-Mail: youhong@hit.edu.cn

Address: School of Marine Science and Technology, Harbin Institute of Technology at Weihai, Weihai  
264209, China

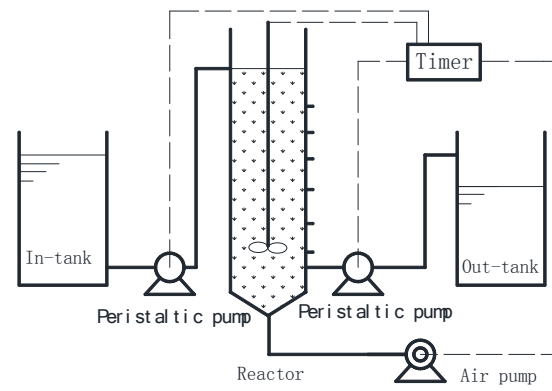

**Fig. S1.** The setup of sequencing batch reactor (SBR)

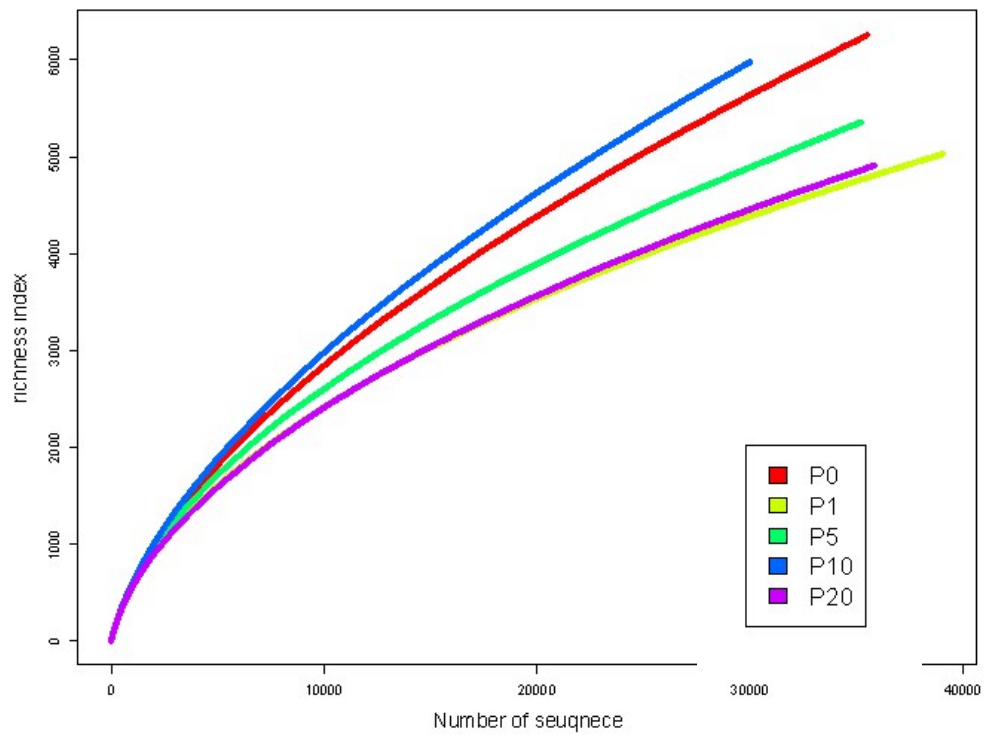

**Fig.S2** Richness rarefaction plot of species in the activated sludge

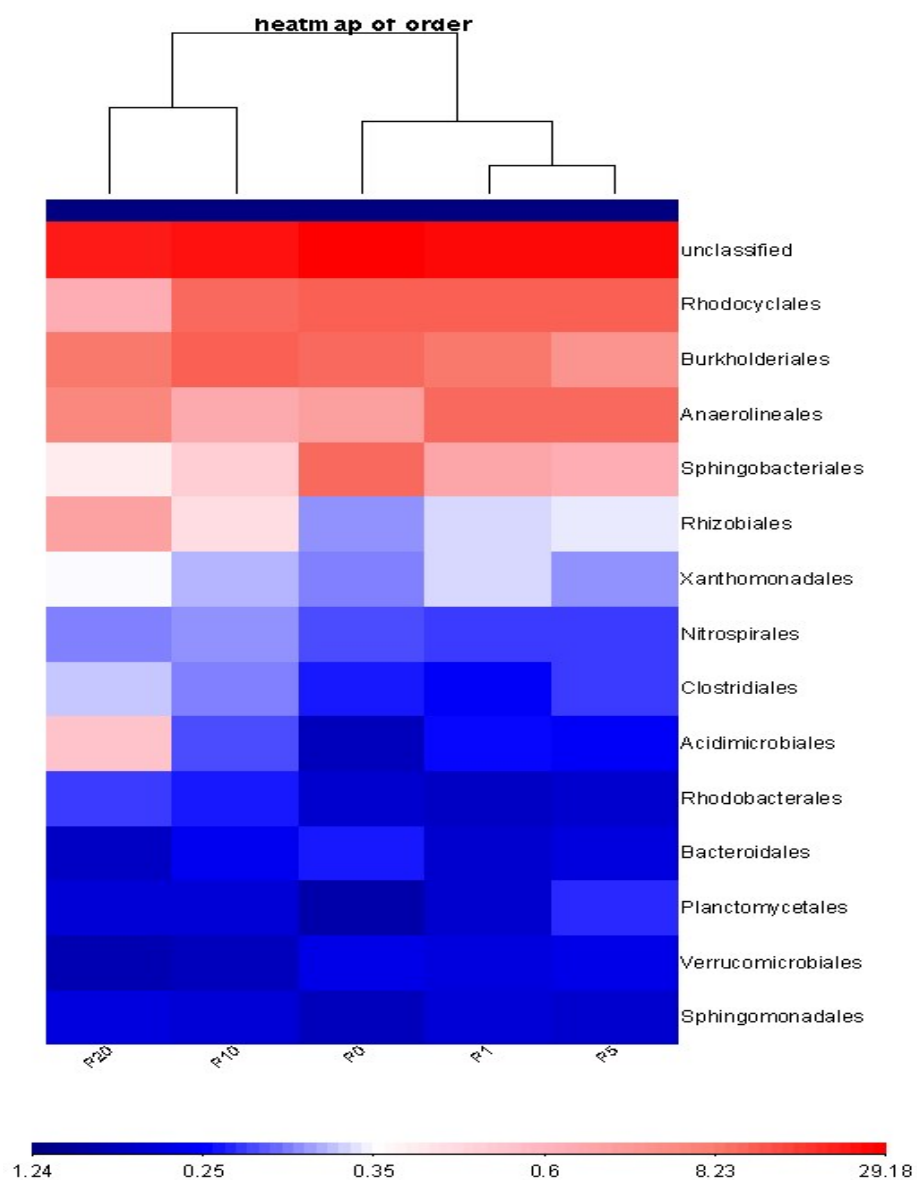

Fig.S3 Species distribution heatmap at the order level in the activated sludge

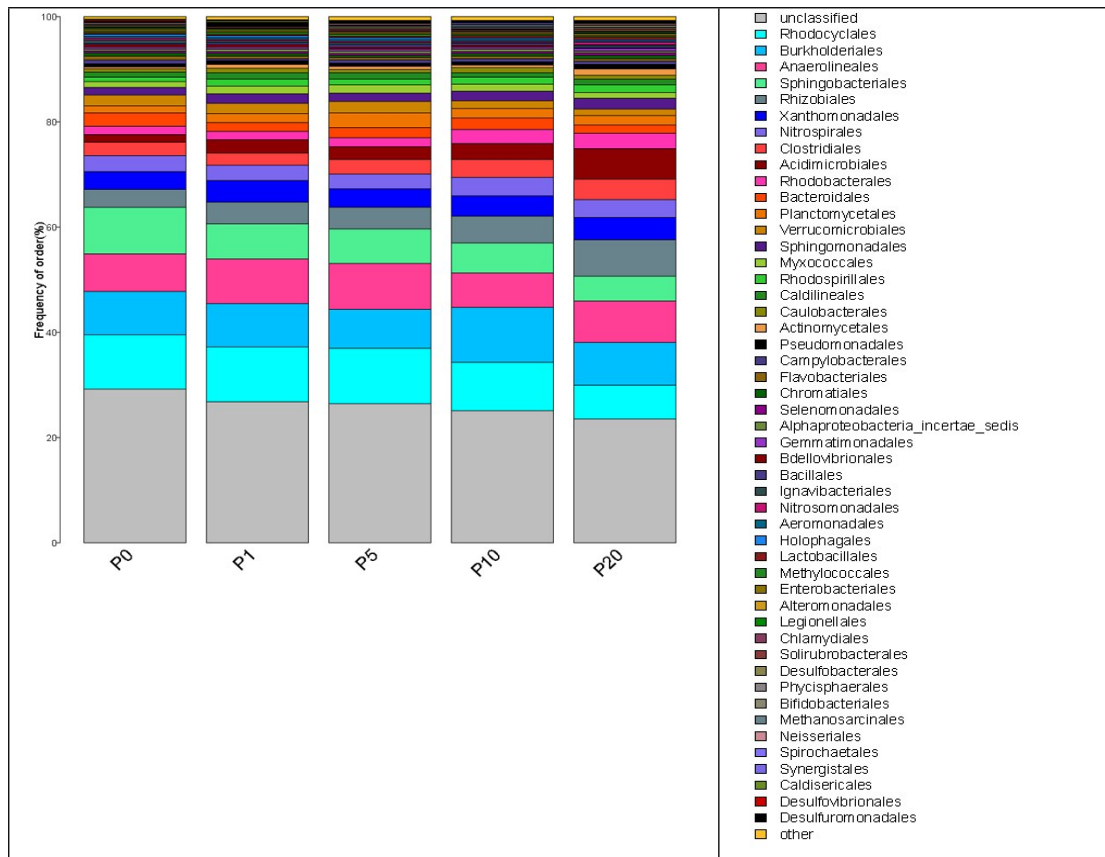

Fig.S4 Flora abundance at the order level in the activated sludge
